# Supplementary material for: Can Reduced Intake Associated with Downsizing a High Energy Dense Meal Item be Offset by Increased Vegetable Variety in 3–5-year-old Children?
Source: MDPI journal article supplement (doi:10.3390/nu10121879), 2018-12-03
Supplement: s1 [file s1]

## Supplementary Material

**Table S1.** Ratings for liking of sandwich and vegetables served to children as lunch.

| Food            | Liking Rating |    |           |    |          |    |           |    |
|-----------------|---------------|----|-----------|----|----------|----|-----------|----|
|                 | Yummy         |    | Just Okay |    | Yucky    |    | Undecided |    |
|                 | <i>n</i>      | %  | <i>n</i>  | %  | <i>n</i> | %  | <i>n</i>  | %  |
| Cheese Sandwich | 32            | 64 | 6         | 12 | 10       | 20 | 2         | 4  |
| Carrot          | 29            | 58 | 6         | 12 | 15       | 30 | 0         | 0  |
| Cherry Tomatoes | 18            | 36 | 3         | 6  | 24       | 48 | 5         | 10 |
| Cucumber        | 25            | 50 | 3         | 6  | 20       | 40 | 2         | 4  |
| Red Pepper      | 18            | 36 | 3         | 6  | 29       | 58 | 0         | 0  |

Methodology: Food Liking (n=50). The majority of the children (64%) rated the cheese sandwich as 'yummy' (Table S1). Children predominantly rated carrot and cucumber as 'yummy' (58% and 50% respectively) and red pepper and cherry tomatoes as 'yucky' (58% and 48% respectively).
